# **Sepsis Increases Perioperative Metastases in a Murine Model**

Lee-Hwa Tai, PhD<sup>1</sup>, Abhirami A. Ananth, BSc<sup>1,2</sup>, Rashmi Seth, MD, MSc<sup>3</sup>, Almohanad Alkayyal, MSc<sup>1,2,4</sup>, Jiqing Zhang, BCM<sup>2,5,6</sup>, Christiano Tanese de Souza, DVM<sup>2</sup>, Phillip Staibano, MSc<sup>2</sup>, Michael A. Kennedy, PhD<sup>2</sup>, Rebecca C. Auer, MD, MSc<sup>1,2,3</sup>

<sup>1</sup>Department of Biochemistry, Microbiology, and Immunology, Faculty of Medicine, University of Ottawa, Ottawa, Canada

<sup>2</sup>Center for Innovative Cancer Research, Ottawa Hospital Research Institute, Ottawa, Canada

<sup>3</sup>Department of Surgery, Division of General Surgery, University of Ottawa, Ottawa, Canada

<sup>4</sup>Department of Medical Laboratory Technology, University of Tabuk, Tabuk, Saudi Arabia

<sup>5</sup>Department of Neurosurgery, The Second Hospital of Shandong University, Shandong, China

<sup>6</sup>Department of Cellular and Molecular Medicine, Faculty of Medicine, University of Ottawa, Ottawa, Canada

**Corresponding author for manuscript:** Dr. Rebecca Auer, Ottawa General Hospital, 1617 CCW, Box 134, 501 Smyth Road, Ottawa, Ontario, K1H8L6 Canada  
Phone: 613-737-8899 ext. 72791 Fax: 613-739-6646 Email: [rauer@ottawahospital.on.ca](mailto:rauer@ottawahospital.on.ca)

**Financial Support:**

**Running head:** Sepsis and perioperative metastases

## ABSTRACT

**Background:** Cancer surgery can promote tumour metastases and worsen prognosis in patients, but the effects of perioperative complications such as sepsis, blood loss, and hypothermia on subsequent cancer metastases have not been addressed. **Objective:** To evaluate the effect of common perioperative factors on postoperative tumour metastases in a murine model of cancer surgery. We hypothesize that perioperative blood loss, hypothermia, and sepsis facilitates tumour metastases in murine models of cancer surgery. **Methods:** Prior to surgery, pulmonary metastases were established by intravenous challenge of CT26LacZ colon cancer cells in Balb/c mice or B16LacZ melanoma cells in C57Bl/6 mice. Surgical stress was generated through partial hepatectomy (PH) or left nephrectomy (LN). Sepsis was induced by puncturing the cecum to express stool into the abdomen. Hemorrhagic shock was induced by removal of 30% of total blood volume via saphenous vein. Hypothermia was induced by removing the heating apparatus during surgery and lowering core body temperatures to 30°C. Lung tumour burden was quantified 3 days following surgery. **Results:** Surgically stressed mice subjected to Stage 3 hemorrhagic shock or hypothermia did not show an additional increase in their lung tumor burden. In contrast, surgically stressed mice subjected to intraoperative sepsis demonstrated an additional 2-fold increase in the number of tumour metastases. Furthermore, natural killer (NK) cell function, as assessed by YAC-1 tumour cell killing, was significantly attenuated in surgically stressed mice subjected to intraoperative sepsis. Both NK cell killing and metastases were improved with perioperative administration of the toll-like receptor (TLR)-3 ligand, polyI:C. **Conclusions:** Perioperative sepsis, but not hemorrhagic shock or hypothermia, enhances the prometastatic effect of surgery in murine models of cancer. Identification of the mechanisms

underlying perioperative immune suppression will be critical for developing immunomodulation strategies aimed at attenuating perioperative metastatic disease.

# **INTRODUCTION**

Severe trauma causes compensatory changes in immune, neural, endocrine, and metabolic function<sup>1</sup>. Similarly, surgical stress can lead to the onset of prothrombotic and immunosuppressive changes during the postoperative period<sup>2,3</sup>. Many correlative studies have confirmed an association between postoperative complications, immune suppression and worsened cancer survival<sup>4-7</sup>. Our group and others have proposed surgery-induced cellular immune suppression as a primary factor in the progression of cancer, including local recurrence and metastases<sup>8-20</sup>. In humans, suppression of the cellular immune response following major surgery appears to peak at 3 days<sup>21</sup>, but can also persist for weeks<sup>17,22,23</sup>. These immunosuppressive changes are characterized by an imbalance in plasma cytokine levels (i.e. a decrease in the levels of interleukin (IL)-2<sup>24</sup> and IL-12<sup>25</sup> and an increase in the levels of IL-6<sup>24,26,27</sup> and IL-10<sup>28</sup>) and a decrease in the number and function of circulating CD8<sup>+</sup> T cells<sup>29</sup>, dendritic cells<sup>30</sup>, and natural killer (NK) cells<sup>8,12,31</sup>. Specifically, our group reported on the association between coagulation and NK cell function in the development of metastases following cancer surgery<sup>8</sup>. More recently, we employed validated murine models of surgical stress and spontaneous metastases<sup>11</sup> to provide *in vivo* evidence of global NK cell dysfunction in postoperative metastatic disease<sup>32</sup>.

Modern surgical techniques minimize the potentially adverse consequences of perioperative events such as intraoperative blood loss, sepsis, and hypothermia. Despite this, severe intraoperative blood loss occurs in approximately 6–10% of patients with advanced cancer<sup>33</sup>. Every year, two million operations are complicated by infection in the US and surgery accounts for 30% of sepsis diagnoses<sup>34</sup>. Furthermore, 8.5% of all cancer-related deaths are due to the concurrent onset of severe sepsis<sup>35</sup>. Hypothermia, which is defined as a core body temperature of

<36°C, is a common occurrence during surgery, as up to 70% of patients are hypothermic on admission to the recovery room<sup>36</sup>.

Clinical studies in cancer patients have confirmed an association between perioperative factors such as hypothermia<sup>37</sup>, blood loss<sup>38,39</sup>, and postoperative infections<sup>40,41</sup>, and increased cancer recurrence and reduced cancer-specific survival following cancer surgery.

Despite the epidemiological evidence linking perioperative complications with increased surgical stress and worse cancer outcomes, the role of intraoperative blood loss, sepsis, and hypothermia in immunosuppression and metastases has not been directly addressed. Our study incorporates three murine surgical models of CRC to investigate the effect of blood loss, sepsis, and hypothermia on NK cell function and metastatic disease. Taking measures to reduce perioperative complications and/or employing preoperative neoadjuvant immunotherapy will help to improve survival outcomes and reduce recurrences of cancer.

## **METHODS**

### ***Cell lines***

CT26.LacZ mouse colon carcinoma and YAC-1 mouse lymphoma cells were purchased from the American Type Culture Collection (ATCC, Manassas, VA, USA). CT26.LacZ cells were cultured in HyQ high glucose Dulbecco's modified Eagles medium (GE healthcare, Mississauga, ON, CA) supplemented with 10% fetal bovine serum (CanSera, Etobicoke, ON, CA). YAC-1 cells were cultured in HyClone™ Roswell Park Memorial Institute medium (RPMI)-1640 medium (GE healthcare, Mississauga, ON, CA) supplemented with 10% fetal bovine serum (CanSera, Etobicoke, ON, CA) and 1x of Penicillin/Streptomycin (Invitrogen, Carlsbad, CA, USA).

### ***Animals***

Female age-matched (6–8 weeks old at study initiation) BALB/c mice (Charles River Laboratories, Wilmington, MA, USA) were housed in specific pathogen-free conditions. Animal studies complied with the Canadian Council on Animal Care guidelines and were approved by the University of Ottawa Animal Research Ethics Board.

### ***Induction of experimental metastasis and surgical stress***

Mice were subjected to 2.5% isofluorane (Baxter Corporations, Mississauga, ON, CA) for the induction and maintenance of anesthesia. Routine perioperative care for mice, including the subcutaneous administration of buprenorphine (0.05 mg/kg) for pain control the day of surgery and every 8 hours for 2 days following surgery, was conducted in concordance with University of Ottawa protocols. Surgical stress was induced via an abdominal laparotomy (i.e. 3-cm midline incision), which was preceded by an intravenous challenge with  $3 \times 10^5$  CT26.lacZ cells to establish pulmonary metastases. Abdominal laparotomy was commenced 10 minutes following tumor inoculation as previously described<sup>11</sup>. Animals were euthanized at 18 hours or 3 days following tumor inoculation and their lungs were stained with X-gal (Bioshop Canada Inc., Burlington, ON, CA), as described previously<sup>42</sup>. The total number of surface metastases on the largest lung lobe (left lobe) were quantified using a stereomicroscope (Leica Microsystems, Richmond Hill, ON, CA).

### ***Hypovolemic stress model***

Hypovolemic shock was induced by preoperatively bleeding mice prior to tumour inoculation. Mice were bled either 20% (300 uL) or 30% (450 uL) of their total blood volume by puncturing the saphenous vein just above the foot. Systolic arterial pressure (SAP) in conscious mice before and after saphenous vein bleeding was measured using a tail-cuff sphygmomanometer. To do

this, mice were kept in a warmed black box and an inflatable cuff was applied to the base of the tail. The tail was then placed on a piezoelectric sensor for analysis of the pressure waveforms.

### ***Hypothermia stress model***

Intraoperative hypothermic shock was induced by placing mice directly on the metal surgical surface without a heating pad immediately following tumour inoculation. Mice were kept under hypothermic conditions and anesthesia for approximately 2 hours and were subsequently housed under normothermic conditions. Rectal temperatures were recorded every 15 minutes throughout the procedure to verify that hypothermia was maintained.

### ***Sepsis stress model***

Intraoperative polymicrobial sepsis was induced in mice by cecal puncture at the time of abdominal laparotomy (i.e. 3-cm midline incision). Polymicrobial sepsis was confirmed by Gram stain of peritoneal lavage fluid, which was isolated 18 hours following surgery. Bacterial counts were determined by serial dilution of peritoneal lavage fluid and overnight culture on tryptic soy broth agar plates at 37°C.

### ***Ex-vivo NK cell cytotoxicity assay***

Chromium release assays were conducted as previously described<sup>43</sup>. Briefly, splenocytes were isolated from surgically stressed and control mice 18 hours after surgery. Pooled and sorted NK cells were resuspended at a concentration of  $2.5 \times 10^6$  cells/mL. These cells were then mixed with chromium-labeled YAC-1 target cells, which were resuspended at a concentration of  $3 \times 10^4$  cells/mL at various effector-to-target (E:T) ratios (i.e. 50:1, 25:1, 12:1, 6:1).

### ***Statistical analysis***

Statistical tests were performed using GraphPad Prism (GraphPad, San Diego, CA, USA). One-way ANOVAs with Bonferroni multiple comparison tests as well as Student's t-tests with equal

variances were conducted. Data were reported as the mean  $\pm$  standard error of the mean (SEM).

An alpha value of  $< 0.05$  was considered to be statistically significant.

## **RESULTS**

### ***Severe hypovolemia increases pulmonary metastases but is not additive with surgical stress***

To discern the effect of hypovolemic shock on perioperative metastases, mice were first exsanguinated through the saphenous vein while systolic blood pressure was measured using a tail cuff sphygmomanometer (Figure 1A). A significant reduction in tail cuff blood pressure was observed following the loss of 450  $\mu$ L of blood, which is representative of 30% of the total blood volume of a 25 g mouse ( $71.67 \pm 2.186$  mmHg vs.  $107.7 \pm 1.453$  mmHg,  $p = 0.0002$ ); moreover, the reduction in tail cuff blood pressure was exacerbated when 450  $\mu$ L of blood loss was combined with surgical stress ( $61.67 \pm 1.667$  mmHg vs.  $107.7 \pm 1.453$  mmHg,  $p < 0.0001$ ) (Figure 1B). In the absence of surgical stress, hypovolemic changes due to 30% blood loss significantly increased the number of pulmonary metastases when compared to mice that did not undergo blood loss ( $438.3 \pm 56.89$  vs.  $205.0 \pm 24.88$ ,  $p = 0.0212$ ) (Figure 1C). In addition to hypovolemia, surgical stress alone significantly increased tumour metastases compared to mice that did not undergo surgery ( $287.5 \pm 39.01$  vs.  $95.40 \pm 32.35$ ,  $p = 0.0065$ ). However, a combination of 30% blood loss and surgical stress did not further increase the number of tumour metastases above surgical stress alone ( $285.6 \pm 35.94$  vs.  $287.5 \pm 39.01$ ,  $p = 0.9725$ ) (Figure 1D).

### ***Severe hypothermia does not increase pulmonary metastases***

Next, we sought to assess the effect of perioperative hypothermic shock on metastases in a surgical murine model. Anaesthetized animals were maintained at either normothermic ( $35.22^{\circ}\text{C}$ – $37.95^{\circ}\text{C}$ ) or hypothermic ( $26.35^{\circ}\text{C}$ – $29.03^{\circ}\text{C}$ ) temperatures for a 3-hour period following injection of the tumour cells and surgical stress (Figure 2A and 2B). We observed that



hypothermia alone did not significantly increase pulmonary metastases when compared to normothermic mice ( $27.75 \pm 7.667$  vs.  $21.38 \pm 7.720$ ,  $p = 0.5673$ ) (Figure 2C). Surgical stress in normothermic conditions did significantly increase the number of pulmonary metastases compared to mice that did not undergo surgery ( $391.5 \pm 38.18$  vs.  $136.4 \pm 21.47$ ,  $p = 0.0024$ ) (Figure 2D). When combined with surgical stress, however, hypothermia did not further increase the number of pulmonary metastases when compared to mice that underwent surgical stress under normothermic conditions ( $391.5 \pm 38.18$  vs.  $341.8 \pm 80.90$ ,  $p = 0.6265$ ).

***Postoperative polymicrobial sepsis further increases pulmonary metastases as compared to surgery alone***

Next, we assessed the effects of sepsis on pulmonary metastases by contaminating the peritoneal cavity with stool expressed through caecal puncture (Figure 3A). Peritoneal lavage contained both Gram-negative and Gram-positive bacteria, as well as coccus and bacillus-shaped bacteria, confirming that the caecal puncture lead to polymicrobial sepsis (Figure 3B). Surgical stress alone resulted in a significant increase in pulmonary metastases when compared to control mice ( $374.3 \pm 20.68$  vs.  $266.4 \pm 16.15$ ,  $p = 0.0006$ ); furthermore, we observed that a combination of polymicrobial sepsis and surgical stress resulted in a significant increase in pulmonary metastases when compared to mice that underwent surgical stress in the absence of sepsis ( $480.3 \pm 18.98$  vs.  $374.3 \pm 20.68$ ,  $p = 0.0010$ ) (Figure 3C). Previous studies have shown that suppression of NK cell cytotoxic activity is responsible for the increase in cancer burden following surgical stress [30]. In this study, we demonstrate that sepsis, in conjunction with surgical stress, significantly attenuated NK cell cytotoxic activity below that of surgical stress alone (Figure 3D).

***Perioperative NK cell stimulation reduces metastases and restores NK cell function in the presence of sepsis.***

We have shown that postoperative immune dysfunction can be ameliorated through the use of NK cell-stimulating agents such as polyI:C, a double-stranded RNA mimetic. In this study, we examined whether sepsis-induced postoperative pulmonary metastases could be suppressed by perioperative immune stimulation with polyI:C (Figure 4A). We demonstrated that treatment with polyI:C alone, but not antibiotics alone significantly decreased the number of pulmonary metastases compared to mice undergoing surgical stress and (Figure 4A). Furthermore, antibiotic therapy did not have an effect on pulmonary metastases in mice with sepsis in the presence of polyI:C ( $25.80 \pm 4.306$  vs.  $18.25 \pm 8.390$ ,  $p = 0.4213$ ). In support of a role for NK cells in mediating this effect we also demonstrated that the addition of polyI:C lead to enhanced NK cell cytotoxic activity by 10-fold, a magnitude similar to the reduction in metastases seen with perioperative use (Figure 4B).

## **DISCUSSION**

Perioperative complications are associated with tumour recurrence and inferior cancer outcomes<sup>44,45</sup>. Although hypovolemia in the absence of surgical stress did lead to an increase in lung metastases our findings demonstrate that neither severe intraoperative hypovolemia nor hypothermia impact the prometastatic effects of surgical stress. Correlative clinical studies confirm that postoperative infections following surgery can accelerate the time to cancer recurrence<sup>46-48</sup>. Here, using murine models we demonstrate that polymicrobial sepsis in conjunction with surgical stress facilitates the development of perioperative lung metastases. Our results suggest that the combined immunosuppressive effects of surgical trauma and sepsis dampen anti-tumour immune responses, ultimately leading to an increase in metastases. In

addition to the immunosuppressive effects of surgical stress, severe sepsis can induce lymphocyte exhaustion<sup>49</sup>, apoptosis of immune cells<sup>50,51</sup>, and a predominance of immunoregulatory cells, including regulatory T cells<sup>52,53</sup> and myeloid-derived suppressor cells<sup>54</sup>. This highly suppressive environment likely worsens the already immunosuppressive environment present in most cancer patients in need of surgical intervention<sup>55,56</sup>. Thus, the immunosuppressive effects of surgery, sepsis, and cancer may interact to severely dampen immune activation and increase the likelihood of cancer recurrence and metastatic disease.

Our findings also suggest that sepsis induces its prometastatic effect by inhibiting NK cell cytotoxic function. In the cancer microenvironment, the anti-tumour function of NK cells is suppressed<sup>57</sup>, while a decrease in NK cell number and function in patients undergoing surgery for CRC is associated with heightened mortality and cancer recurrence suggesting that the suppressive effects of sepsis likely exacerbate the already impaired NK cell function<sup>58,59</sup>. In agreement with our findings, previous studies have demonstrated that sepsis in a non-surgical context can impair NK cell cytotoxicity<sup>60</sup>, a finding that has been attributed to a heightened activation of regulatory cell subsets<sup>61</sup>. In particular, murine sepsis models have shown that an increase in regulatory T cells contributes to post-sepsis immunosuppression and potentiates tumour growth<sup>62</sup>. NK cells are a critical component of anti-tumour immunity and so, based on our findings, we suggest that the inhibition of NK cell function is a key player in perioperative cancer recurrence following surgical stress and septic insult.

Tumour-infiltrating NK cells and lymphocytes are associated with improved prognosis several malignancies<sup>63-67</sup>. The enhancement of preoperative NK cell activation with PolyI:C, a TLR3 ligand, to counteract the immunosuppressive effects of surgery and sepsis and attenuate perioperative metastases formation is largely in agreement with the inhibitory effects of

poly(I:C) upon tumour outgrowth in non-surgical models of lung metastases<sup>68</sup>. While polyI:C is ineffective in primates because of inactivation by natural enzymes, other NK stimulators, such as poly-ICLC<sup>69</sup> (stabilized with poly-lysine) or a virus-derived TLR agonist, like the influenza vaccine, could be safely and effectively employed in the perioperative period. Taken together, boosting NK cell activation may counteract the immunosuppressive effects of sepsis and protect against the development of metastatic disease and has potential as a perioperative cancer immunotherapeutic strategy.

## **FIGURE LEGENDS**

### **Figure 1. Hemorrhagic shock does not increase metastatic disease.**

**A. *Experimental overview.*** Balb/C mice were bled through the saphenous vein (indicated by the white arrow) and subsequently injected intravenously (IV) through the tail vein with  $3 \times 10^5$  CT26lacZ cells. Approximately 1 hour later, surgical stress (sx) was generated by laparotomy (Lap) (5 cm incision). Mice were sacrificed at 72h to quantify lung metastases. **B. *Blood pressure is reduced following surgical stress and blood loss.*** Blood pressure (mmHg) was measured following a 5 day training period (Day 1 – 5), prior to bleeding (Pre), immediately following bleeding (Post-BL), and immediately following surgical stress (Post-Sx and BL, n=3). **C. *Blood loss increases metastatic burden.*** Lung metastases were measured on Day 3 following no blood loss (no BL) or 20% (20% BL) or 30% blood loss (30% BL). **D. *Blood loss does not increase metastatic disease associated with surgical stress.*** Lung metastases were measured on Day 3 in mice that did not undergo surgical stress (No Sx) and animals undergoing a laparotomy (Lap) alone or in combination with 30% blood loss (30% BL). Error bars represent  $\pm$  SEM.

### **Figure 2. Hypothermia does not increase metastatic disease.**

**A. *Experimental overview.*** Balb/C mice were injected intravenously (IV) through the tail vein with  $3 \times 10^5$  CT26lacZ cells. Mice undergoing hypothermia were placed directly on the metal block (shown) while control mice were kept under normothermic conditions with heating pads. One hour into anesthesia, surgical stress (Sx) was generated by laparotomy (Lap). Mice were removed from anesthesia after 2 hours total and kept in normal housing conditions. Temperature was measured during anesthesia using a rectal probe (as shown). Mice were sacrificed at 72h to quantify lung metastases. **B. *Maintenance of body temperature.*** Mice kept under normothermic conditions alone ranged from 31.88°C to 38.16°C in comparison to hypothermic conditions which ranged from 23.98°C to 32.75°C for 100 min. **C. *Hypothermia alone does not increase lung metastases.*** The impact of body temperature upon lung metastases was assessed in mice maintained at normothermic and hypothermic conditions. **D. *Prometastatic effects of surgical stress are not impacted by hypothermic conditions.*** Lung metastases were measured in mice that did not undergo surgery (No Sx) and mice undergoing a laparotomy under normothermic (Lap) and hypothermic conditions (Hypothermic + Lap). Error bars represent  $\pm$  SEM.

**Figure 3. Sepsis increases metastatic disease burden.**

**A. *Experimental overview.*** Balb/C mice were injected intravenously (IV) through the tail vein with  $3 \times 10^5$  CT26lacZ cells. One hour later, surgical stress (Sx) was generated by laparotomy (Lap) or laparotomy with caecal puncture (Lap+CP). The caecum was externalized and punctured using an 18G needle (as shown). Mice were sacrificed at 72h to quantify lung metastases. **B. *Detection of bacteria in the peritoneal cavity.*** A representative Gram stain of peritoneal lavage fluid from a mouse that underwent Lap+CP indicates polymicrobial sepsis due to the presence of both cocci and bacilli. **C. *Sepsis increases lung metastases.*** Lung metastases were quantified in mice that did not undergo surgical stress (No Sx), laparotomy alone (Lap) or

laparotomy combined with sepsis (Lap + Sepsis). D. ***Intraoperative sepsis impairs NK cell-mediated cytotoxicity.*** Chromium release killing assay of YAC-1 tumour target cells by DX5+ NK cells isolated from animals that did not undergo surgical stress (No Sx), laparotomy alone (Lap) in the presence or absence of sepsis (Lap + Sepsis). Effector (DX5+ NK cells) to target (Yac1) (E:T) ratios of 6:1, 25:1, and 50:1 are shown. Error bars represent  $\pm$  SEM.

**Figure 4. Prometastatic effects of sepsis are reversed with perioperative NK cell activation.**

**A. Lung metastases are reduced in polyI:C treated animals.** Lung metastases were quantified in untreated animals (No Sx) and following laparotomy (Lap) without or with perioperative antibiotic treatment administered subcutaneously (Abx, Imipenem 0.5 mg) and preoperative polyI:C treatment (PolyI:C, 150  $\mu$ g/200  $\mu$ L PBS). **B. Preoperative PolyI:C restores NK cell cytotoxicity.** Chromium release killing assay of YAC-1 tumour target cells by DX5+ NK cells isolated from animals undergoing treatments as above. Effector (DX5+ NK cells) to target (Yac1) (E:T) ratios of 6:1, 12:1, 25:1, and 50:1 are shown. Error bars represent  $\pm$  SEM.

## REFERENCES

1. Desborough JP. The stress response to trauma and surgery. *Br J Anaesth.* 2000;85(1):109-117. doi:10.1093/bja/85.1.109.
2. Caine GJ, Stonelake PS, Lip GY, Kehoe ST. The hypercoagulable state of malignancy: pathogenesis and current debate. *Neoplasia.* 2002;4(6):465-473. doi:10.1038/sj.neo.7900263.
3. Kimura F, Shimizu H, Yoshidome H, Ohtsuka M, Miyazaki M. Immunosuppression following surgical and traumatic injury. *Surg Today.* 2010;40(9):793-808. doi:10.1007/s00595-010-4323-z.
4. Young J, Han CH, Kim YK. Postoperative Complications Influence Prognosis and Recurrence Patterns in Periapillary Cancer. *World J Surgery* 2013;37(9):2234-2241. doi:10.1007/s00268-013-2106-6.
5. Artinyan A, Chen GJ, Berger DH. Infectious Postoperative Complications Decrease Long-term Survival in Patients Undergoing Curative Surgery for Colorectal Cancer. 2015;261(3):497-505. doi:10.1097/SLA.0000000000000854.
6. Khuri SF, Henderson WG, Depalma RG. Determinants of Long-Term Survival After Major Surgery and the Adverse Effect of Postoperative Complications. 2005;242(3):326-343. doi:10.1097/01.sla.0000179621.33268.83.
7. Aahlin EK, Olsen F, Uleberg B, Jacobsen BK, Lassen K. Major postoperative complications are associated with impaired long-term survival after gastro-esophageal and pancreatic cancer surgery: a complete national cohort study. *BMC Surg.* 2016:1-8. doi:10.1186/s12893-016-0149-y.
8. Seth R, Tai L-H, Falls T, et al. Surgical Stress Promotes the Development of Cancer Metastases by a Coagulation-Dependent Mechanism Involving Natural Killer Cells in a Murine Model. *Ann Surg.* 2013;258(1):158-168. doi:10.1097/SLA.0b013e31826fcbdb.
9. Ananth AA, Tai LH, Lansdell C, et al. Surgical Stress Abrogates Pre-Existing Protective T Cell Mediated Anti-Tumor Immunity Leading to Postoperative Cancer Recurrence. *PLoS One.* 2016;11(5):e0155947. doi:10.1371/journal.pone.0155947.
10. Tai L-H, Zhang J, Scott KJ, et al. Perioperative influenza vaccination reduces postoperative metastatic disease by reversing surgery-induced dysfunction in natural killer cells. *Clin Cancer Res.* 2013;19(18):5104-5115. doi:10.1158/1078-0432.CCR-13-0246.
11. Tai L-H, Tanese de Souza C, Sahi S, et al. A Mouse Tumor Model of Surgical Stress to Explore the Mechanisms of Postoperative Immunosuppression and Evaluate Novel Perioperative Immunotherapies. *J Vis Exp.* 2014;(85). doi:10.3791/51253.
12. Tai LH, De Souza CT, B?langer S, et al. Preventing postoperative metastatic disease by inhibiting surgery-induced dysfunction in natural killer cells. *Cancer Res.* 2013. doi:10.1158/0008-5472.CAN-12-1993.
13. Goldfarb Y, Sorski L, Benish M, Levi B, Melamed R, Ben-Eliyahu S. Improving postoperative immune status and resistance to cancer metastasis: a combined perioperative approach of immunostimulation and prevention of excessive surgical stress responses. *Ann Surg.* 2011;253(4):798-810. doi:10.1097/SLA.0b013e318211d7b5.
14. Benish M, Bartal I, Goldfarb Y, et al. Perioperative use of beta-blockers and COX-2 inhibitors may improve immune competence and reduce the risk of tumor metastasis. *Ann Surg Oncol.* 2008;15(7):2042-2052. doi:10.1245/s10434-008-9890-5.
15. Glasner A, Avraham R, Rosenne E, et al. Improving survival rates in two models of



- spontaneous postoperative metastasis in mice by combined administration of a beta-adrenergic antagonist and a cyclooxygenase-2 inhibitor. *J Immunol.* 2010;184(5):2449-2457. doi:10.4049/jimmunol.0903301.
16. Colacchio TA, Yeager MP, Hildebrandt LW. Perioperative immunomodulation in cancer surgery. *Am J Surg.* 1994;167(1):174-179. <http://www.ncbi.nlm.nih.gov/pubmed/8311130>.
17. Da Costa ML, Redmond P, Bouchier-Hayes DJ. The effect of laparotomy and laparoscopy on the establishment of spontaneous tumor metastases. *Surgery.* 1998;124(3):516-525. <http://www.ncbi.nlm.nih.gov/pubmed/9736904>.
18. Shiromizu A, Suematsu T, Yamaguchi K, Shiraishi N, Adachi Y, Kitano S. Effect of laparotomy and laparoscopy on the establishment of lung metastasis in a murine model. *Surgery.* 2000;128(5):799-805. doi:10.1067/msy.2000.108047.
19. Ben-Eliyahu S, Page GG, Yirmiya R, Shakh G. Evidence that stress and surgical interventions promote tumor development by suppressing natural killer cell activity. *Int J Cancer.* 1999;80(6):880-888. doi:10.1002/(sici)1097-0215(19990315)80:6<880::aid-ijc14>3.0.co;2-y.
20. Tsuchiya Y, Sawada S, Yoshioka I, et al. Increased surgical stress promotes tumor metastasis. *Surgery.* 2003;133(5):547-555. doi:10.1067/msy.2003.141.
21. Coffey JC, Wang JH, Smith MJF, Bouchier-Hayes D, Cotter TG, Redmond HP. Excisional surgery for cancer cure: therapy at a cost. *Lancet Oncol.* 2003;4(12):760-768. <http://www.ncbi.nlm.nih.gov/pubmed/14662433>.
22. Da Costa ML, Redmond HP, Finnegan N, Flynn M, Bouchier-Hayes D. Laparotomy and laparoscopy differentially accelerate experimental flank tumour growth. *Br J Surg.* 1998;85(10):1439-1442. doi:10.1046/j.1365-2168.1998.00853.x.
23. Espi A, Arenas J, Garcia-Granero E, Marti E, Lledo S. Relationship of curative surgery on natural killer cell activity in colorectal cancer. *Dis Colon Rectum.* 1996;39(4):429-434. <http://www.ncbi.nlm.nih.gov/pubmed/8878504>.
24. Baxevanis CN, Papilas K, Dedoussis G V, Pavlis T, Papamichail M. Abnormal cytokine serum levels correlate with impaired cellular immune responses after surgery. *Clin Immunol Immunopathol.* 1994;71(1):82-88. <http://www.ncbi.nlm.nih.gov/pubmed/8137562>.
25. Ahlers O, Nachtigall I, Lenze J, et al. Intraoperative thoracic epidural anaesthesia attenuates stress-induced immunosuppression in patients undergoing major abdominal surgery. *Br J Anaesth.* 2008;101(6):781-787. doi:10.1093/bja/aen287.
26. Nakazaki H. Preoperative and postoperative cytokines in patients with cancer. *Cancer.* 1992;70(3):709-713. <http://www.ncbi.nlm.nih.gov/pubmed/1320454>.
27. Ogawa K, Hirai M, Katsube T, et al. Suppression of cellular immunity by surgical stress. *Surgery.* 2000;127(3):329-336. doi:10.1067/msy.2000.103498.
28. Whitson BA, D'Cunha J, Maddaus MA. Minimally invasive cancer surgery improves patient survival rates through less perioperative immunosuppression. *Med Hypotheses.* 2007;68(6):1328-1332. doi:10.1016/j.mehy.2006.09.063.
29. Bartal I, Melamed R, Greenfeld K, et al. Immune perturbations in patients along the perioperative period: alterations in cell surface markers and leukocyte subtypes before and after surgery. *Brain Behav Immun.* 2010;24(3):376-386. doi:10.1016/j.bbi.2009.02.010.
30. Ho CS, Lopez JA, Vuckovic S, Pyke CM, Hockey RL, Hart DN. Surgical and physical stress increases circulating blood dendritic cell counts independently of monocyte counts.



- Blood*. 2001;98(1):140-145. <http://www.ncbi.nlm.nih.gov/pubmed/11418473>.
31. Greenfeld K, Avraham R, Benish M, et al. Immune suppression while awaiting surgery and following it: dissociations between plasma cytokine levels, their induced production, and NK cell cytotoxicity. *Brain Behav Immun*. 2007;21(4):503-513. doi:10.1016/j.bbi.2006.12.006.
32. Tai LH, de Souza CT, Belanger S, et al. Preventing postoperative metastatic disease by inhibiting surgery-induced dysfunction in natural killer cells. *Cancer Res*. 2013;73(1):97-107. doi:10.1158/0008-5472.CAN-12-1993.
33. Pereira J, Phan T. Management of bleeding in patients with advanced cancer. *Oncologist*. 2004;9(5):561-570. doi:10.1634/theoncologist.9-5-561.
34. Vogel TR, Dombrovskiy VY, Lowry SF. Trends in postoperative sepsis: are we improving outcomes? *Surg Infect*. 2009;10(1):71-78. doi:10.1089/sur.2008.046.
35. Williams MD, Braun LA, Cooper LM, et al. Hospitalized cancer patients with severe sepsis: analysis of incidence, mortality, and associated costs of care. *Crit Care*. 2004;8(5):R291-8. doi:10.1186/cc2893.
36. Forstot RM. The etiology and management of inadvertent perioperative hypothermia. *J Clin Anesth*. 1995;7(8):657-674. <http://www.ncbi.nlm.nih.gov/pubmed/8747566>.
37. Moslemi-kebria M, El-nashar SA. Cytoreductive Surgery for Ovarian Cancer and Perioperative Morbidity. 2012;119(3):590-596. doi:10.1097/AOG.0b013e3182475f8a.
38. Jiang W, Fang YJ, Wu XJ, et al. Intraoperative blood loss independently predicts survival and recurrence after resection of colorectal cancer liver metastasis. *PLoS One*. 2013;8(10):e76125. doi:10.1371/journal.pone.0076125.
39. Katz SC, Shia J, Jarnagin WR, Fong Y, Blumgart LH, Dematteo RP. Operative Blood Loss Independently Predicts Recurrence. 2009;249(4):0-6. doi:10.1097/SLA.0b013e31819ed22f.
40. Nespoli A, Gianotti L, Totis M, et al. Correlation between postoperative infections and long-term survival after colorectal resection for cancer. *Tumori*. 2004;90(5):485-490. <http://www.ncbi.nlm.nih.gov/pubmed/15656334>.
41. Yamashita K, Makino T, Miyata H, Miyazaki Y, Takahashi T. Postoperative Infectious Complications are Associated with Adverse Oncologic Outcomes in Esophageal Cancer Patients Undergoing Preoperative Chemotherapy. 2016;c:2106-2114. doi:10.1245/s10434-015-5045-7.
42. Kirstein JM, Graham KC, Mackenzie LT, et al. Effect of anti-fibrinolytic therapy on experimental melanoma metastasis. *Clin Exp Metastasis*. 2009;26(2):121-131. doi:10.1007/s10585-008-9221-z.
43. Patel R, Belanger S, Tai LH, Troke AD, Makrigiannis AP. Effect of Ly49 haplotype variance on NK cell function and education. *J Immunol*. 2010;185(8):4783-4792. doi:10.4049/jimmunol.1001287.
44. Hirai T, Yamashita Y, Mukaida H, Kuwahara M, Inoue H, Toge T. Poor prognosis in esophageal cancer patients with postoperative complications. *Surg Today*. 1998;28(6):576-579. doi:10.1007/s005950050187.
45. Nowacki MP, Szymendera JJ. The strongest prognostic factors in colorectal carcinoma. Surgicopathologic stage of disease and postoperative fever. *Dis Colon Rectum*. 1983;26(4):263-268. <http://www.ncbi.nlm.nih.gov/pubmed/6839898>.
46. Tsujimoto H, Ueno H, Hashiguchi Y, Ono S, Ichikura T, Hase K. Postoperative infections are associated with adverse outcome after resection with curative intent for colorectal

- cancer. *Oncol Lett.* 2010;1(1):119-125. doi:10.3892/ol\_00000022.
47. Schietroma M, Pessia B, Carlei F, Cecilia EM, Amicucci G. Intestinal permeability, systemic endotoxemia, and bacterial translocation after open or laparoscopic resection for colon cancer: a prospective randomized study. *Int J Color Dis.* 2013;28(12):1651-1660. doi:10.1007/s00384-013-1751-4.
48. Varty PP, Linehan IP, Boulos PB. Intra-abdominal sepsis and survival after surgery for colorectal cancer. *Br J Surg.* 1994;81(6):915-918. <http://www.ncbi.nlm.nih.gov/pubmed/8044621>.
49. Boomer JS, Shuherk-shaffer J, Hotchkiss RS, Green JM. A prospective analysis of lymphocyte phenotype and function over the course of acute sepsis. 2012.
50. Hotchkiss RS, Tinsley KW, Swanson PE, et al. Sepsis-induced apoptosis causes progressive profound depletion of B and CD4+ T lymphocytes in humans. *J Immunol.* 2001;166(11):6952-6963. <http://www.ncbi.nlm.nih.gov/pubmed/11359857>.
51. Hotchkiss RS, Swanson PE, Freeman BD, et al. Apoptotic cell death in patients with sepsis, shock, and multiple organ dysfunction. *Crit Care Med.* 1999;27(7):1230-1251. <http://www.ncbi.nlm.nih.gov/pubmed/10446814>.
52. Venet F, Chung CS, Kherouf H, et al. Increased circulating regulatory T cells (CD4(+)CD25 (+)CD127 (-)) contribute to lymphocyte anergy in septic shock patients. *Intensive Care Med.* 2009;35(4):678-686. doi:10.1007/s00134-008-1337-8.
53. Wisnoski N, Chung CS, Chen Y, Huang X, Ayala A. The contribution of CD4+ CD25+ T-regulatory-cells to immune suppression in sepsis. *Shock.* 2007;27(3):251-257. doi:10.1097/01.shk.0000239780.33398.e4.
54. Gabrilovich DI, Nagaraj S. Myeloid-derived suppressor cells as regulators of the immune system. *Nat Rev Immunol.* 2009;9(3):162-174. doi:10.1038/nri2506.
55. Lindau D, Gielen P, Kroesen M, Wesseling P, Adema GJ. The immunosuppressive tumour network: myeloid-derived suppressor cells, regulatory T cells and natural killer T cells. *Immunology.* 2013;138(2):105-115. doi:10.1111/imm.12036.
56. Keskinov AA, Shurin MR. Myeloid regulatory cells in tumor spreading and metastasis. *Immunobiology.* 2015;220(2):236-242. doi:10.1016/j.imbio.2014.07.017.
57. Pahl J, Cerwenka A. Immunobiology Tricking the balance: NK cells in anti-cancer immunity. *Immunobiology.* 2017;222(1):11-20. doi:10.1016/j.imbio.2015.07.012.
58. Tartter PI, Steinberg B, Barron DM, Martinelli G. The prognostic significance of natural killer cytotoxicity in patients with colorectal cancer. *Arch Surg.* 1987;122(11):1264-1268. <http://www.ncbi.nlm.nih.gov/pubmed/3675190>.
59. Peng YP, Zhu Y, Zhang JJ, et al. Comprehensive analysis of the percentage of surface receptors and cytotoxic granules positive natural killer cells in patients with pancreatic cancer, gastric cancer, and colorectal cancer. *J Transl Med.* 2013;11:262. doi:10.1186/1479-5876-11-262.
60. Maturana P, Puente J, Miranda D, Sepulveda C, Wolf ME, Mosnaim AD. Natural killer cell activity in patients with septic shock. *J Crit Care.* 1991;6(1):42-45. doi:10.1016/0883-9441(91)90032-o.
61. Kessel A, Bamberger E, Masalha M, Toubi E. The role of T regulatory cells in human sepsis. *J Autoimmun.* 2009;32(3-4):211-215. doi:10.1016/j.jaut.2009.02.014.
62. Cavassani KA, Carson WF th, Moreira AP, et al. The post sepsis-induced expansion and enhanced function of regulatory T cells create an environment to potentiate tumor growth. *Blood.* 2010;115(22):4403-4411. doi:10.1182/blood-2009-09-241083.

63. Villegas FR, Coca S, Villarrubia VG, et al. Prognostic significance of tumor infiltrating natural killer cells subset CD57 in patients with squamous cell lung cancer. *Lung Cancer*. 2002;35(1):23-28. doi:10.1016/S0169-5002(01)00292-6.
64. Ishigami S, Natsugoe S, Tokuda K, et al. Prognostic value of intratumoral natural killer cells in gastric carcinoma. *Cancer*. 2000;88(3):577-583.
65. Coca S, Perez-Piqueras J, Martinez D, et al. The prognostic significance of intratumoral natural killer cells in patients with colorectal carcinoma. *Cancer*. 1997;79(12):2320-2328. <http://www.ncbi.nlm.nih.gov/pubmed/9191519>.
66. Xu B, Chen L, Li J, Zheng X, Shi L, Jiang J. Prognostic value of tumor infiltrating NK cells and macrophages in stage II+III esophageal cancer patients. *Oncotarget*. 2016;7(October). doi:10.18632/oncotarget.12484.
67. Deschoolmeester V, Baay M, Van Marck E, et al. Tumor infiltrating lymphocytes: an intriguing player in the survival of colorectal cancer patients. *BMC Immunol*. 2010;11:19. doi:10.1186/1471-2172-11-19.
68. Forte G, Rega A, Morello S, et al. Polyinosinic-polycytidylic acid limits tumor outgrowth in a mouse model of metastatic lung cancer. *J Immunol*. 2012;188(11):5357-5364. doi:10.4049/jimmunol.1103811.
69. Hartman LLR, Crawford JR, Makale MT, et al. Pediatric phase II trials of poly-ICLC in the management of newly diagnosed and recurrent brain tumors. *J Pediatr Hematol Oncol*. 2014;36(6):451-457. doi:10.1097/MPH.0000000000000047.

**A**

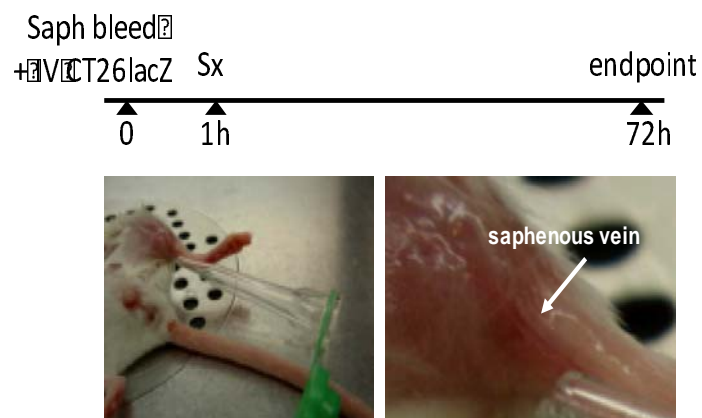

**B**

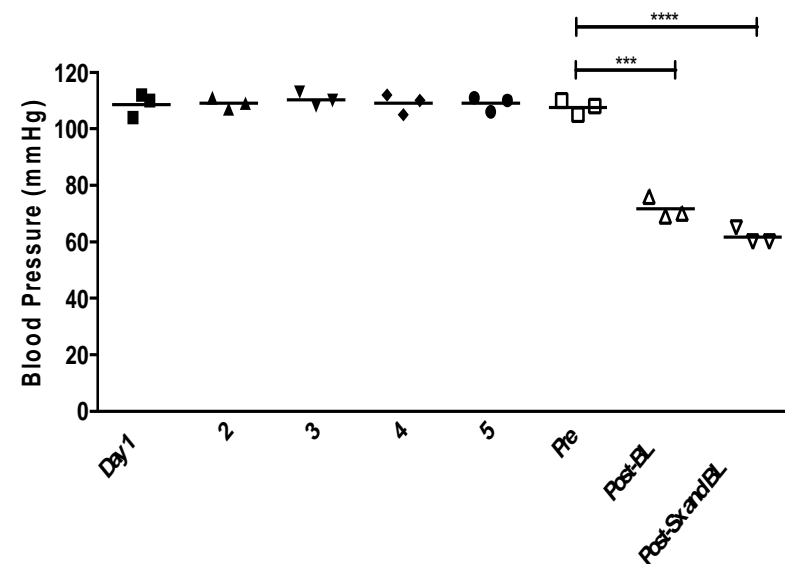

**C**

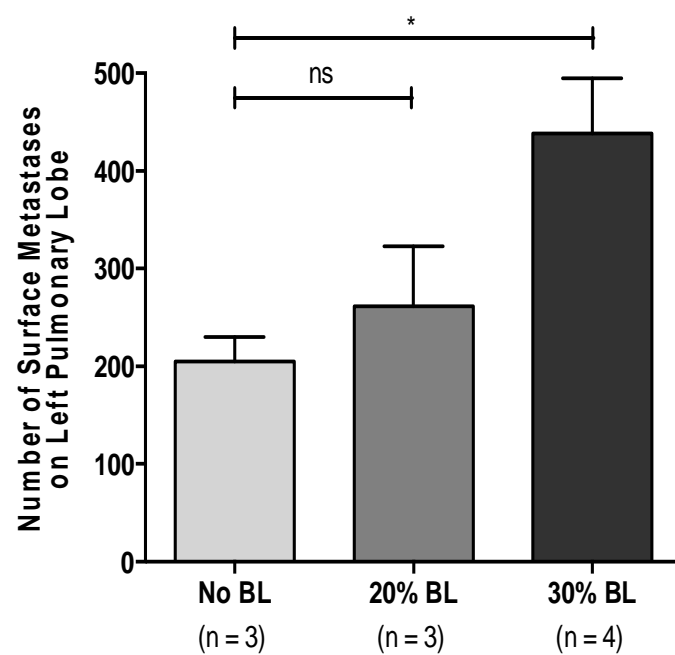

**D**

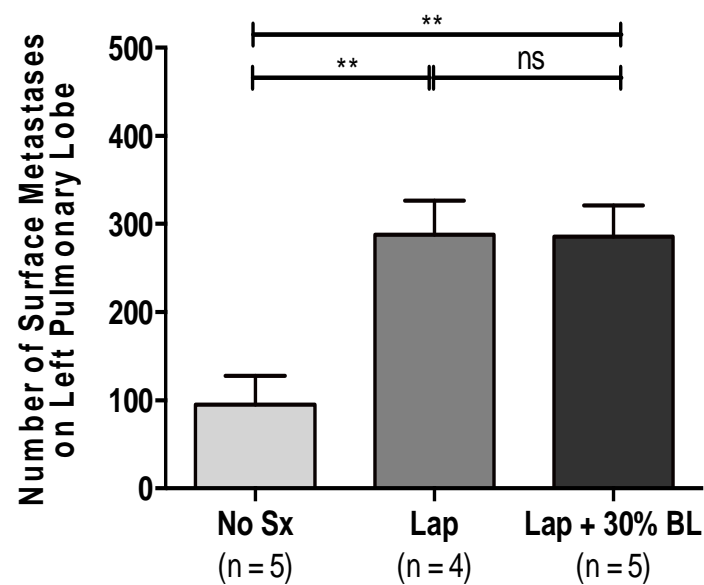

**A**

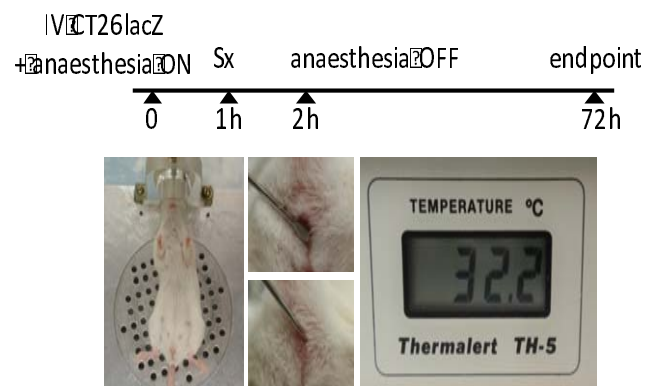

**B**

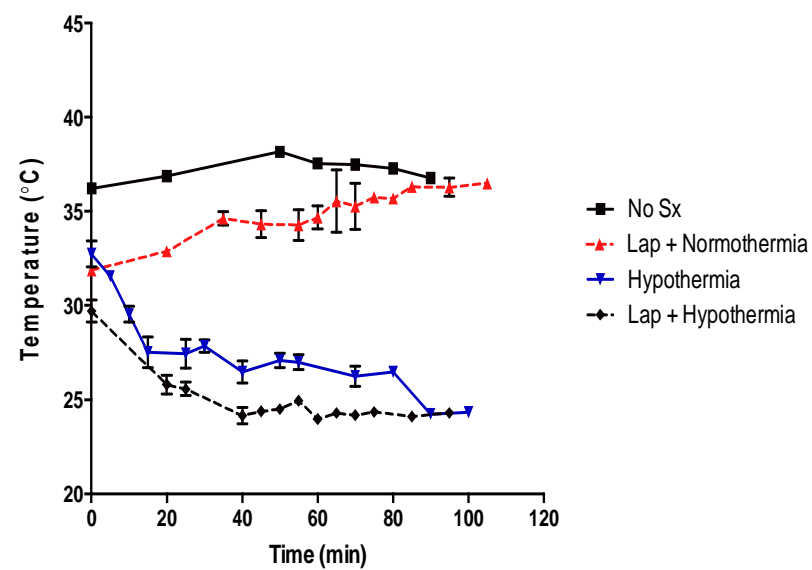

**C**

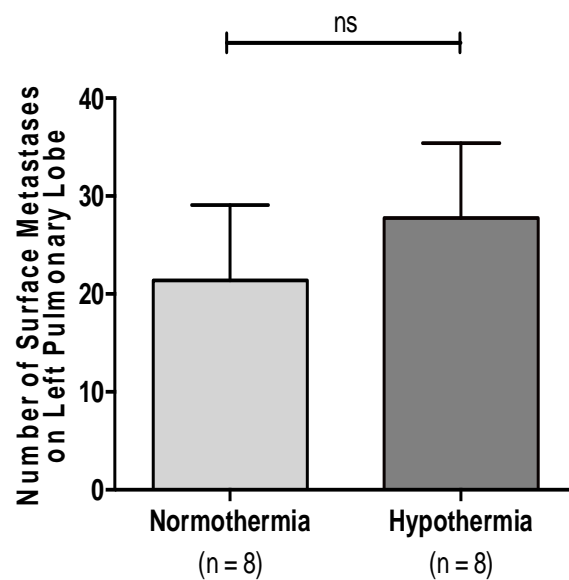

**D**

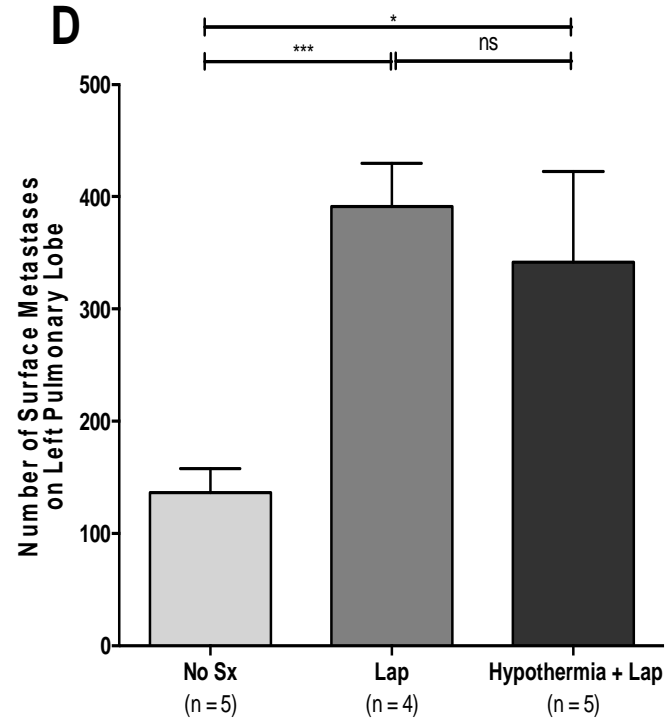

**A**

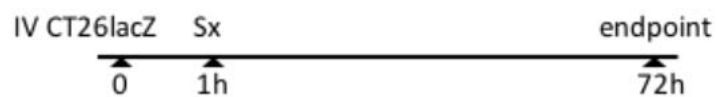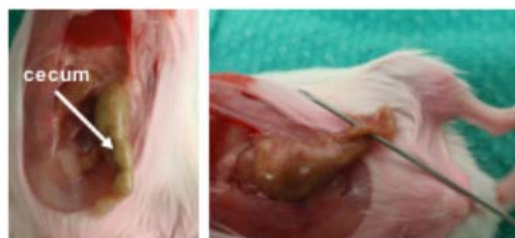

**B**

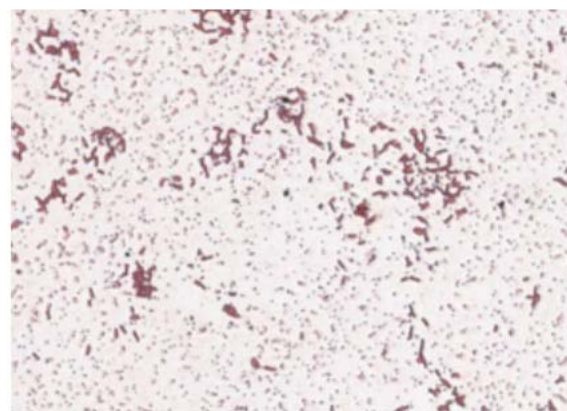

**C**

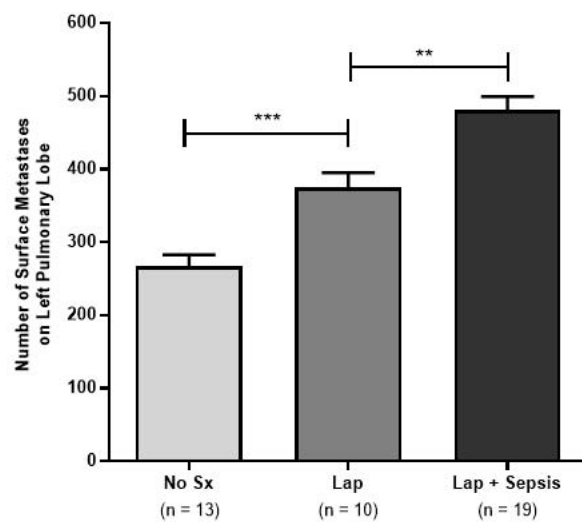

**D**

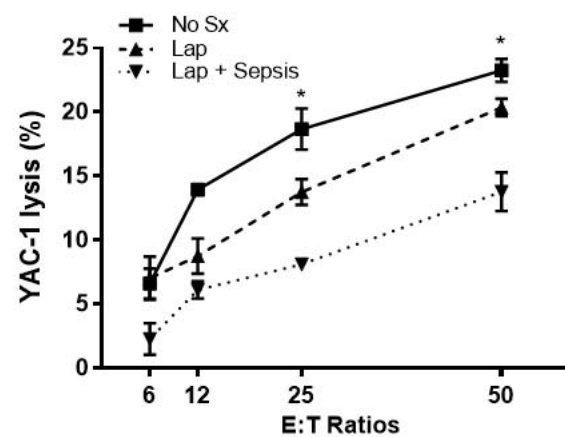

**A**

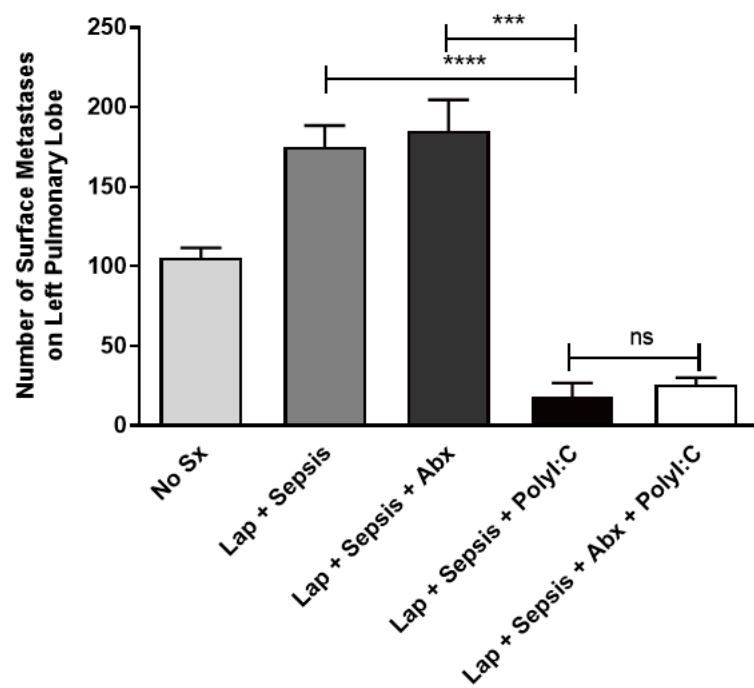

**B**

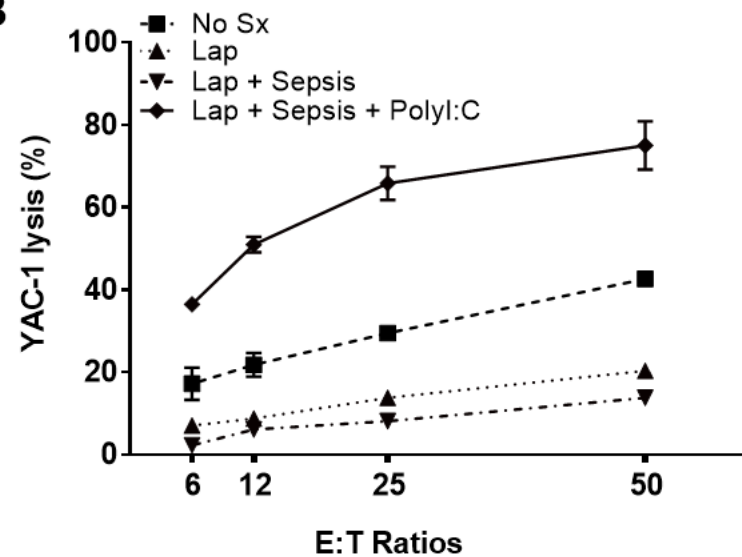

Source: http://www.biorxiv.org/content/10.1101/142083v1.full.pdf
